# Supplementary material for: Protein protected gold nanoparticles as a fluorophore for the highly selective and ultrasensitive determination of bisphenol A in plastic samples
Source: Royal Society of Chemistry journal article supplement (doi:10.1039/c3ay41246f), 2013-01-01

[Supporting information](#)

**Protein protected gold nanoparticles as fluorophore for  
the highly selective and ultrasensitive determination of  
bisphenol A in plastic samples**

**N. Vasimalai and S. Abraham John\***

*Center for Nanoscience and Nanotechnology  
Department of Chemistry, Gandhigram Rural Institute  
Gandhigram – 624 302, Dindigul, Tamilnadu, India.*

**Fig.S1:** HR-TEM image freshly prepared BSA free AuNPs.

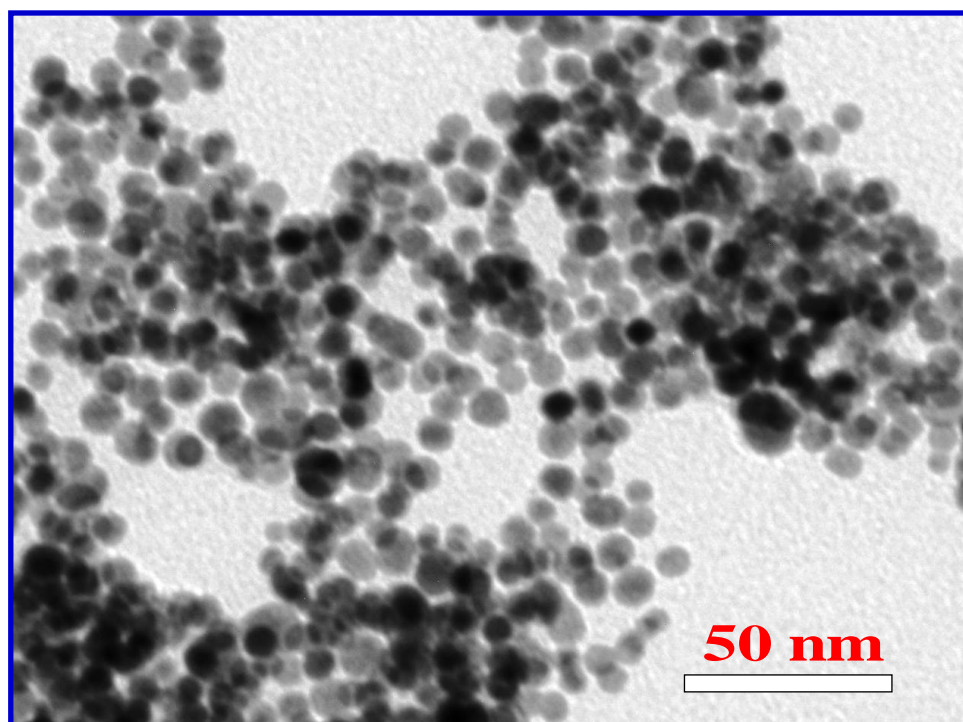

**Fig.S2:** HR-TEM image two days aged BSA free AuNPs.

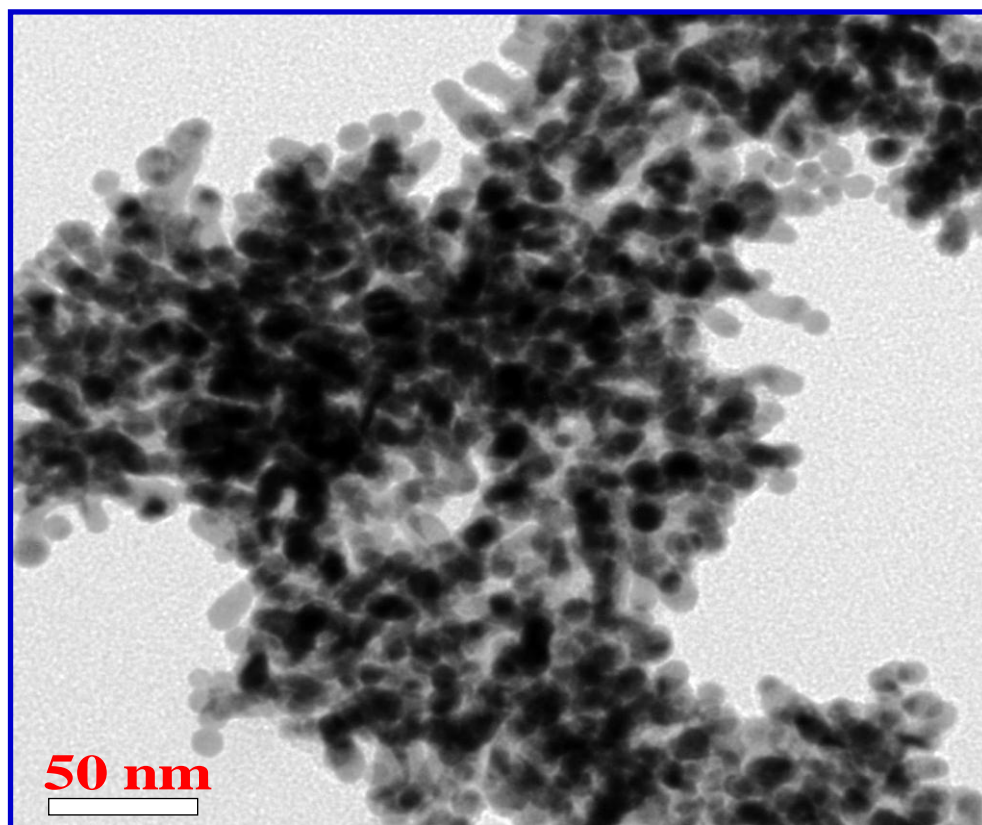

Supplement: c3ay41246f.pdf [file c3ay41246f.pdf]
